# Supplementary material for: Identifying Sensitive Periods for the Impact of Physical Abuse on Psychopathology Symptoms
Source: Research Square preprint supplement (doi:10.21203/rs.3.rs-4579176/v1), 2024-07-12
Supplement: Supplementary file 1 [file 6519e2793c8ea20cce6d1014.docx]

**Appendix**

We detail here the procedure employed to construct variables denoting the occurrence of physical abuse experienced by children at discrete ages between 4 and 17 years old, with a two-year interval. The following steps elucidate the variable generation:

1. **Defining Age Intervals.** Age intervals spanning from 4 to 17 years old were established, with each interval representing a two-year period. Specifically, ages 4 and 5 were grouped together, ages 6 and 7 formed another interval, and so forth, until ages 16 and 17.

**2. Generation of Binary Indicator Variables.** For each age interval, binary indicator variables were created to signify the presence or absence of physical abuse. These variables were labeled as "HasPhyAbuAge_age", where "age" represents the corresponding age interval. If a child experienced physical abuse at a particular age within the interval, the binary indicator variable for that age was assigned a value of 1; otherwise, it was assigned a value of 0.

**3. Ensuring Temporal Consistency.** To maintain temporal consistency across ages, adjustments were made to the binary indicator variables. Specifically, if physical abuse was reported at any age within an interval, the binary indicator variables for subsequent ages within the same interval were set to 1. Conversely, if physical abuse was reported at any age prior to the current interval, the binary indicator variables for ages within that interval were set to 0.

**4. Application of Continuity Adjustments:** Continuity adjustments were systematically applied across all binary indicator variables for each child, grouped by their respective ID. This process ensured that the presence or absence of physical abuse was accurately represented across all age intervals for each individual child.

For example, consider the example of a child with ID "NW30226". Supplemental Table 4 demonstrates the presence (1) or absence (0) of physical abuse at each age (from 4 to 16) for this child.
