# Supplementary material for: Identifying Sensitive Periods for the Impact of Physical Abuse on Psychopathology Symptoms
Source: Research Square preprint supplement (doi:10.21203/rs.3.rs-4579176/v1), 2024-07-12
Supplement: Supplementary file 2 [file 7e3f9fa09dd9b3e10acd502f.docx]

**Supplemental Tables**

**Supplemental Table** **1**

*Descriptive statistics for continuous variables*

| Name of Variable | Explanation | Mean | SD | Range |
| --- | --- | --- | --- | --- |
| Age | Child’s Age (4-17) | 9.44 | 3.88 | 4-16 |
| OtherAbus | Sum of severity rating for other types of Abuse Allegations (Sexual Abuse, Neglect, Drug) during a given age interval | 0.29 | 1.09 | 0-19 |
| CB4TINT | T Score for internalizing | 50.39 | 10.77 | 31-100 |
| CB4TEXT | T Score for externalizing | 54.44 | 11.43 | 31-100 |

**Supplemental Table** **2**

*Frequency table for categorical variables*

| Name of Variable | Category | Frequency | Percentage |
| --- | --- | --- | --- |
| Gender |  |  |  |
| Female | 686 | 51.46% |
| Male | 647 | 48.54% |
| Race |  |  |  |
| Black | 721 | 54.09% |
| Hispanic | 97 | 7.28% |
| Mixed | 161 | 12.08% |
|  | White | 354 | 26.56% |

**Supplemental Table 3**

*Fixed and random effects estimates for internalizing and externalizing behaviors*

|  | ***Fixed Effects*** | **Coefficient (standard error)** | ***p*-value** | **Coefficient (standard error)** | ***p*-value** |
| --- | --- | --- | --- | --- | --- |
|  | **Intercept** | 51.27 (0.50) | <0.001*** | 56.18 (0.57) | <0.001*** |
| **Age** | | 0.66 (0.09) | <0.001*** | -0.41 (0.08) | <0.001*** |
|  | **Age2** | -0.07 (0.01) | <0.001*** | 0.02 (0.01) | <0.001*** |
|  | Female | -0.58 (0.43) | 0.176 | 0.46 (0.49) | 0.354 |
|  | Black | -2.56 (0.51) | <0.001*** | -2.07 (0.58) | <0.001*** |
|  | Hispanic | -2.17 (0.89) | 0.015* | -2.96 (1.03) | 0.004  ** |
|  | Mixed | -0.96 (0.74) | 0.200 | 0.59 (0.86) | 0.494 |
| **Timing of physical abuse** | | | | | |
|  | Age ­4-6 | 0.95 (0.79) | 0.231 | 1.56 (0.89) | 0.078 |
|  | Age 6-8 | 1.28 (0.74) | 0.084 | 1.80 (0.75) | 0.016* |
|  | Age 8-10 | 3.59 (0.82) | <0.001*** | 2.81 (0.80) | <0.001*** |
|  | Age 10-12 | 0.97 (0.90) | 0.285 | 0.37 (0.88) | 0.673 |
|  | Age 12-14 | 0.19 (0.81) | 0.812 | 1.54 (0.78) | 0.048* |
|  | Age 14-16 | 3.27 (1.03) | 0.002** | 3.23 (1.00) | 0.001** |
|  | Age 16-17 | 7.67 (1.70) | <0.001*** | 2.20 (1.62) | 0.176 |
|  | **Other abuse** | 0.04 (0.10) | 0.686 | 0.17 (0.09) | 0.072 |
|  | **Intercept** | 7.10 | | 8.85 | |
|  | **Age** | 0.73 | | 0.78 | |
|  | **Level-1 error** | 7.28 | | 6.86 | |
|  | **Intraclass correlation** | -0.26 | | -0.35 | |

**Supplemental Table 4**

*Constructed binary variables representing physical abuse at different age intervals*

| **ID** | **Original PhyAbu variable** | **Age interval** | **HasPhyAbuAge_age** | | | | | | |
| --- | --- | --- | --- | --- | --- | --- | --- | --- | --- |
| 4 | 6 | 8 | 10 | 12 | 14 | 16 |
| **NW30226** | 0 | 4 | 0 | 0 | 0 | 0 | 0 | 0 | 0 |
| 2 | 6 | 0 | 1 | 0 | 0 | 0 | 0 | 0 |
| 1 | 8 | 0 | 1 | 1 | 0 | 0 | 0 | 0 |
| 6 | 10 | 0 | 1 | 1 | 1 | 0 | 0 | 0 |
| 7 | 12 | 0 | 1 | 1 | 1 | 1 | 0 | 0 |
| 1 | 14 | 0 | 1 | 1 | 1 | 1 | 1 | 0 |
| 0 | 16 | 0 | 1 | 1 | 1 | 1 | 1 | 0 |
